# Supplementary material for: Soil microbial diversity and functional capacity associated with the production of edible mushroom Stropharia rugosoannulata in croplands
Source: PeerJ. 2022 Oct 3;10:e14130. doi: 10.7717/peerj.14130 (PMC9536307; doi:10.7717/peerj.14130)
Supplement: Data S1 [file peerj-10-14130-s001.xlsx]

## Sheet: Total nitrogen
				Quality score(mg/kg)
					NC			Chili - S.rugosoannulata			Rice - S.rugosoannulata
				Before	1102.54	1089.14	1036	1654.06	1573.94	1734.44	2116.15	2098.46	2154.66
				During	1505.64	1594.36	1554.65	1566.92	1547.05	1587.63	2965.71	3070.65	2987.55
				After	1362.89	1370.55	1331.54	1962.24	1920.35	1964.55	3351.5	3309.04	3389.35

## Sheet: Available phosphorus
			Quality score(mg/kg)
				NC			Chili - S.rugosoannulata			Rice - S.rugosoannulata
			Before	4.2	4.3	4.5	56.5	56.5	56.7	157.7	161	158.4
			During	9.3	8.6	7.8	41.2	42.9	42.5	159.5	154.8	161.7
			After	6.7	6.9	7.1	140.5	139.2	141.5	163.8	170.2	167.5

## Sheet: Available potassium
				NC			Chili - S.rugosoannulata			Rice - S.rugosoannulata
			Before	149	152	155	183	178	186	270	256	261
			During	146	149	151	177	175	183	341	339	345
			After	278	287	284	287	270	275	351	349	352

## Sheet: Organic carbon
		Quality score(mg/kg)
			NC			Chili - S.rugosoannulata			Rice - S.rugosoannulata
		Before	10897.1	10745.4	10956.5	16536.6	15968.4	17547.2	21033.5	22357.1	21658.6
		During	13885.4	14786.9	14951.7	18976.3	19437.4	18671.5	23663.6	24687.1	23854.6
		After	17853.1	18951.6	17568.4	20368.3	20425.6	21125.3	24895.7	24687.1	24961.7

## Sheet: Soil moisture
					Relative percentage(%)
					NC			Chili - S.rugosoannulata			Rice - S.rugosoannulata
				Before	31.6	32.5	31.9	39.2	38.6	40.5	50.3	49.7	48.6
				During	85.9	85.1	84.7	85.1	85.7	86.6	84.9	85.5	86.4
				After	41.3	40.8	41.7	43.8	42.9	43.7	46.9	46.5	47.4

## Sheet: Yield 
			kg/mu
			NC			Chili - S.rugosoannulata			Rice - S.rugosoannulata
			2154	2067	2049	3195	3274	3241	3597	3614	3675

## Sheet: Amino acid 
			(μg/mg)
			sampleId	Asp	Thr	Ser	Glu	Gly	Ala	Val	Met	Ile	Leu	Tyr	Phe	His	Lys	Arg	Pro
			DP11	1.636	0.878	0.884	2.399	0.714	0.973	0.976	0.332	0.681	1.197	0.553	0.863	3.036	0.933	0.731	0.498
			DP12	1.663	0.901	0.92	2.563	0.733	0.968	0.949	0.295	0.677	1.211	0.547	0.846	2.872	0.981	0.76	0.469
			DP13	1.712	0.924	0.873	2.124	0.698	0.984	0.991	0.311	0.643	1.268	0.513	0.856	2.994	0.967	0.748	0.491
			LJ11	1.616	0.984	1.001	3.261	0.828	1.431	1.125	0.325	0.803	1.396	0.622	0.939	2.255	1.088	0.79	0.589
			LJ12	1.528	0.95	0.956	3.191	0.78	1.25	1.122	0.286	0.785	1.354	0.639	0.918	2.255	1.044	0.765	0.569
			LJ13	1.624	0.971	0.994	3.241	0.831	1.421	1.064	0.314	0.814	1.712	0.599	0.964	2.194	1.103	0.795	0.517
			ST11	2.067	1.165	1.128	3.16	1.078	1.535	1.277	0.518	0.914	1.616	0.606	1.118	6	1.392	0.926	0.584
			ST12	2.015	1.071	1.052	2.993	1.047	1.475	1.237	0.434	0.88	1.54	0.577	0.956	5.701	1.361	0.882	0.613
			ST13	2.097	1.149	1.094	3.049	1.087	1.497	1.243	0.487	0.921	1.514	0.599	1.054	5.943	1.412	0.954	0.5985
